10 **ABSTRACT**

11 Hyperparasites (species which parasitise other parasites) are common in natural populations and  
12 affect many parasitic taxa, including: eukaryotic parasites; bacterial and fungal pathogens; and insect  
13 parasitoids. Hyperparasitism is therefore likely to shape the ecology and evolution of many host-  
14 parasite systems, and represents a promising method for biocontrol (e.g. treating antimicrobial  
15 resistant infections). However, the eco-evolutionary consequences of hyperparasitism have received  
16 little attention. We use a host-parasite-hyperparasite model to explore how introducing a  
17 hyperparasite drives the evolution of parasite virulence, and how this affects host population  
18 dynamics. We show when the introduction of a hyperparasite selects for higher or lower parasite  
19 virulence, and how this changes the disease burden for the host population. Crucially, we show that  
20 variation in the virulence and infectivity of hyperparasites, along with the probability of co-  
21 transmission, can lead to a previously unseen hysteresis effect, whereby small shifts in hyperparasite  
22 characteristics can lead to sudden shifts in parasite virulence. We show that hyperparasites can  
23 induce diversification in parasite virulence, leading to the coexistence of high and low virulence  
24 strains. Our results show hyperparasites can have dramatic effects on the evolution of parasite  
25 virulence, and that the use of hyperparasites in biocontrol should therefore be approached with  
26 caution.

## 27 INTRODUCTION

28 Hyperparasitism, wherein parasitic organisms are themselves parasitised by another species, is  
29 ubiquitous in the natural world. Hyperparasitism has been observed across many taxa, including  
30 bacterial (Greer 2005; Ashelford, Day, and Fry 2003) and fungal (Mikhailov, Simdyanov, and Aleoshin  
31 2016) pathogens, parasitic worms (Mohan et al. 2020) and other eukaryotic parasites (Wendling et  
32 al. 2017), and among insect parasitoids (Haelewaters, Page, and Pfister 2018). For example, many  
33 human bacterial pathogens are parasitised by bacteriophages, including *E. Coli* (e.g. phage O157:H7  
34 (Munns et al. 2015)); *Salmonella typhimurium* (e.g. phage  $\phi$ AB2 (Berchieri, Lovell, and Barrow  
35 1991)); and *Klebsiella pneumoniae* (e.g. phage B5055 (Chhibber, Kaur, and Kumari 2008)).  
36 Hyperparasitism is also common among fungal plant pathogens, such as the powdery mildew fungus  
37 *Podosphaera plantaginis* with the hyperparasitic fungus *Ampelomyces* spp. (Parratt and Laine 2018),  
38 or the chestnut blight fungus *Cryphonectria parasitica* (Nuss 2005) which can be infected by  
39 *Cryphonectria hypovirus 1* (Parratt and Laine 2016).

40

41 Hyperparasites are understood to play a major role in the ecology of parasites, and have been  
42 shown to influence both the early epidemic dynamics and the overwintering success (Parratt and  
43 Laine 2018) of plant pathogens. They have also been implicated as a driver of seasonal epidemics of  
44 cholera (Faruque et al. 2005). In addition to ecological effects on the parasite, hyperparasites can  
45 have significant effects on virulence, either inducing hypovirulence (a reduction in the virulence  
46 experienced by the host, e.g. by reducing the population size of the parasite) or hypervirulence (an  
47 increase in the virulence experienced by the host, e.g. by causing the parasite to release toxins or by  
48 introducing virulence factors). Hyperparasite-induced changes in virulence have been observed in  
49 many bacterial pathogens. For example, a phage protein enhances motility (and hence virulence) of  
50 *E. coli* (Kakkanat et al. 2017); the temperate phage PHB09 reduces the virulence of *Bordetella*  
51 *bronchiseptica* both *in vivo* and *in vitro* (Chen et al. 2020); the phage CTX $\phi$  encodes the cholera toxin

52 within *Vibrio cholerae* (Waldor and Mekalanos 1996); and the phage  $\phi$ CDHM1 interferes with  
53 quorum sensing in *Clostridium difficile* (Hargreaves, Kropinski, and Clokie 2014).

54

55 Due to their ecological and virulence-mediating effects, hyperparasites long have been considered as  
56 possible sources of biological control (biocontrol) for many infectious diseases (Holtappels et al.  
57 2021; Obradovic et al. 2004), including in the agricultural and food industries and in the treatment of  
58 chronic or antimicrobial resistant infections in humans (Gordillo Altamirano and Barr 2019). Indeed,  
59 phage therapy has long been used as an alternative to antibiotics in some countries (Schooley et al.  
60 2017; Ferriol-González and Domingo-Calap 2021). However, little is known about the evolutionary  
61 implications of hyperparasitism for parasites, and so their use as agents of biocontrol in novel  
62 settings could lead to unexpected outcomes for important traits such as parasite infectivity and  
63 virulence. For instance, (Prospero et al. 2021) speculated that the introduction of hyperparasites  
64 which reduce parasite virulence (hypovirulence) might select for higher virulence in chestnut blight  
65 fungus, which has been observed experimentally (Bryner and Rigling 2012).

66

67 Understanding the interplay of host, parasite and hyperparasite ecological and evolutionary  
68 dynamics is crucial not only to the development of novel agents of biocontrol, but also for  
69 understanding their role in natural ecosystems. Theoretical studies of hyperparasites are rare and  
70 have in the past mainly focussed on their ecological consequences (Taylor et al. 1998; Morozov,  
71 Robin, and Franc 2007). Yet recently there has been renewed theoretical interest in hyperparasitism  
72 in an evolutionary context, in the form of theoretical models of hyperparasite evolution (Northrup et  
73 al. 2021) and parasite-hyperparasite coevolution (Sandhu et al. 2021). Two findings are of particular  
74 interest. First, Sandhu et al. (2021), who considered parasite-hyperparasite coevolution, observed  
75 that the introduction of hyperparasites typically increases parasite virulence, but in almost all  
76 scenarios decreases average host mortality. Second, Northrup et al. (2021) observed that when

77 hyperparasites are more readily co-transmitted with evolutionarily static parasites, this selects for  
78 less harm by the hyperparasite due to an increased link between its fitness and parasite transmission  
79 (similar to virulence evolution in vertically transmitted parasites). These findings highlight the  
80 importance of understanding hyperparasitism in both an ecological and an evolutionary context.

81

82 Here, we further investigate the eco-evolutionary consequences of introducing of a hyperparasite  
83 for parasite virulence and the resulting net impact on the host population. We show how the  
84 introduction of hyperparasites can cause an increase in evolved virulence but may cause an increase  
85 or decrease in disease burden depending on the relative infectivity and virulence of hyperparasitised  
86 parasites. We also show how small changes in the effects of the hyperparasite on parasite  
87 transmission and virulence can lead to large shifts in the evolution of virulence due to hysteresis.  
88 Finally, we show that the hyperparasite can induce diversification in parasite virulence, leading to  
89 the coexistence of a relatively high and low virulence strains.

90

## 91 METHODS

### 92 *MODEL DESCRIPTION*

93 We consider a well-mixed population of asexual hosts, parasites, and hyperparasites, where  $S$  is the  
94 density of uninfected (susceptible) hosts,  $I$  is the density of hosts only infected by the parasite  
95 (parasitised) and  $H$  is the density of hosts infected by both the parasite and the hyperparasite  
96 (hyperparasitised). Hosts reproduce at a baseline per-capita rate  $b$ , subject to density-dependent  
97 crowding  $qN$ , with  $q > 0$  and  $N = S + I + H$ . Parasite transmission is density-dependent, with  
98 parasitised and hyperparasitised hosts having parasite transmission rates of  $\beta$  and  $\eta\beta$  to susceptible  
99 hosts, respectively, where  $\beta$  is the baseline transmission rate,  $\eta > 1$  implies “hypertransmission”  
100 (the hyperparasite increases parasite transmissibility) and  $\eta < 1$  implies “hypotransmission” (the

101 hyperparasite decreases parasite transmissibility). Hyperparasites are co-transmitted with parasites  
 102 to susceptible hosts with probability  $\rho$ . Hyperparasite infection of parasitised hosts is also density-  
 103 dependent, with transmission rate  $\sigma$ . All hosts experience a natural mortality rate  $d$ , with parasitised  
 104 and hyperparasitised hosts experiencing additional mortality due to disease at rates  $\alpha$  and  $\lambda\alpha$ ,  
 105 respectively. Thus, when  $\lambda < 1$  the hyperparasite induces hypovirulence (the hyperparasite  
 106 decreases the disease-associated mortality rate) and when  $\lambda > 1$  the hyperparasite induces  
 107 hypervirulence (the hyperparasite increases the disease-associated mortality rate). Both parasitised  
 108 and hyperparasitised hosts recover from infection at rate  $\gamma$ , with no lasting immunity (see Table 1  
 109 for a full summary of model parameters and their default values for the analysis).

110

111 The ecological dynamics for a monomorphic population are described by the following three  
 112 ordinary differential equations:

$$\begin{aligned}\dot{S} &= (b - qN)N - (\beta I + \eta\beta H + d)S + \gamma(I + H) \\ \dot{I} &= (\beta S - \sigma H - (d + \alpha + \gamma))I + (1 - \rho)\eta\beta SH \\ \dot{H} &= (\rho\eta\beta S + \sigma I - (d + \lambda\alpha + \gamma))H\end{aligned}\tag{1}$$

113

| Parameter      | Description                                              | Default value |
|----------------|----------------------------------------------------------|---------------|
| $b$            | Natural birth rate of hosts                              | 2.0           |
| $d$            | Natural mortality rate of hosts                          | 0.5           |
| $q$            | Strength of density dependent competition                | 0.1           |
| $\alpha_{max}$ | Maximum parasite virulence                               | 5.0           |
| $\beta_0$      | Scale factor in parasite virulence-infectivity trade-off | $\sqrt{5}$    |
| $\gamma$       | Host recovery rate                                       | 0.5           |
| $\eta$         | Hyperparasite infectivity modifier                       | n/a           |

|           |                                              |     |
|-----------|----------------------------------------------|-----|
| $\lambda$ | Hyperparasite virulence modifier             | n/a |
| $\rho$    | Probability of hyperparasite co-transmission | 0.5 |
| $\sigma$  | Hyperparasite transmission rate              | 4.0 |

114

Table 1: Model parameters and default values

115 We explore the evolution of parasite virulence under a standard transmission-virulence trade-off  
 116 with diminishing returns, such that  $\beta = \beta(\alpha)$  and  $\beta''(\alpha) < 0$ . For simplicity, we consider a trade-off  
 117 of the form,

$$\beta(\alpha) = \beta_{max} \sqrt{\frac{\alpha}{\alpha_{max}}} = \beta_0 \sqrt{\alpha} \quad (2)$$

118

119 We assume that mutations are sufficiently rare so that the ecological dynamics in Equation 1 reach a  
 120 stable endemic equilibrium (with either the host and parasite, or all three species present; see  
 121 *Supplementary materials*) before a new mutant arises, and that mutations have small phenotypic  
 122 effects. The invasion dynamics of a rare mutant parasite with transmission rate  $\beta_m$  and virulence  $\alpha_m$   
 123 are then,

$$\begin{aligned} \dot{I}_m &= (\beta_m S^* - \sigma H^* - (d + \alpha_m + \gamma)) I_m + (1 - \rho) \eta \beta_m S^* H_m, \\ \dot{H}_m &= (\rho \eta \beta_m S^* - (d + \lambda \alpha_m + \gamma)) H_m + \sigma I_m H^*. \end{aligned} \quad (3)$$

124

125 where asterisks indicate the equilibrium population densities for the resident parasite. The invasion  
 126 fitness  $w(\alpha_m)$  is given by the largest eigenvalue of the next generation matrix (Hurford, Cownden,  
 127 and Day 2010) (see *Supplementary materials*),

$$\begin{bmatrix} \frac{\beta_m S^*}{\sigma H^* + d + \alpha_m + \gamma} + \frac{(1 - \rho) \eta \sigma \beta_m S^* H^*}{(\sigma H^* + d + \alpha_m + \gamma)(d + \lambda \alpha_m + \gamma)} & \frac{(1 - \rho) \eta \beta_m S^*}{d + \lambda \alpha + \gamma} \\ \frac{\rho \eta \sigma \beta_m S^* H^*}{(\sigma H^* + d + \alpha_m + \gamma)(d + \lambda \alpha_m + \gamma)} & \frac{\rho \eta \beta_m S^*}{d + \lambda \alpha + \gamma} \end{bmatrix}$$

128

129 which we omit here for the sake of brevity. We derive the fitness gradient  $F(\alpha) = \left. \frac{\partial w}{\partial \alpha_m} \right|_{\alpha_m = \alpha}$  and

130 hence calculate singular strategies,  $\alpha^*$ , that satisfy  $F(\alpha^*) = 0$ . We determine the evolutionary

131 stability of a singular strategy by the sign of  $E(\alpha^*) = \left. \frac{\partial^2 w}{\partial \alpha_m^2} \right|_{\alpha_m = \alpha = \alpha^*}$  (negative values indicate

132 evolutionary stability), and convergence stability by numerically approximating the derivative

133  $M(\alpha^*) = \left. \frac{\partial^2 w}{\partial \alpha_m \partial \alpha} \right|_{\alpha_m = \alpha = \alpha^*}$  and checking if the inequality  $E(\alpha^*) + M(\alpha^*) < 0$  holds.

134

### 135 *SIMULATIONS*

136 We complement our numerical analysis with simulations of the evolutionary dynamics of our

137 system, which relax the adaptive dynamics assumptions of continuous traits and separate ecological

138 and evolutionary timescales. To perform our simulations, we first create a discretised trait space for

139 the parasite. We then initialise the hyperparasite-free system at its eco-evolutionary attractor, and

140 introduce hyperparasites at an arbitrarily low population density. We use a fourth order Runge-Kutta

141 method to solve the ordinary differential equations over a long time period, stopping when the

142 populations have relatively small changes in size, or the time threshold has been reached.

143 After removing phenotypes that fall below an arbitrary threshold, we choose one of the extant

144 parasite phenotypes (using a weighted probability based on parasite density) and introduce a rare

145 mutant a small phenotypic distance away at a low frequency. We then use this new population as

146 the initial condition for our ordinary differential equation system, which we again evaluate using a

147 fourth order Runge-Kutta method. All code used to produce the figures within this paper is available

148 within the Supplementary Material and on GitHub ([GitHub - JasonRWood/Wood Ashby 2023](#)).

149



150 *MEASURING THE IMPACT OF THE HYPERPARASITE ON THE HOST POPULATION*

151 We assume that the hyperparasite is introduced into a well-established host-parasite system, such  
152 that the parasite is initially at its continuously stable strategy  $\alpha_0$  (see *Supplementary materials*) and  
153 the system is at equilibrium. In addition to exploring the evolutionary implications for parasite  
154 virulence we also consider the ecological implications for the host. Specifically, we consider multiple  
155 metrics to encapsulate relative disease burden following the introduction of the hyperparasite,  
156 namely impacts on: host population size, disease prevalence (proportion of hosts infected), and  
157 mortality rates of infected individuals and the overall host population. These measures are  
158 formulated below, where  $S_0$ ,  $I_0$  and  $N_0$  correspond to the steady state of the population before the  
159 introduction of the hyperparasite, and asterisks indicate the population with the hyperparasite  
160 present (usually evaluated at a continuously stable strategy,  $\alpha^*$ ).

161

162 We measure the relative host population size following the introduction of the hyperparasite as

163  $\Delta_N = \frac{N^*}{N_0}$  and the relative disease-associated mortality rate of infected hosts ( $\Delta_M$ ) is,

164 
$$\Delta_M = \frac{\frac{\alpha^* I^* + \lambda \alpha^* H^*}{I^* + H^*}}{\frac{\alpha_0 I_0}{I_0}} = \frac{\alpha^* (I^* + \lambda H^*)}{\alpha_0}$$

165 **RESULTS**

166 *HYPERPARASITE-INDUCED SHIFTS IN VIRULENCE EVOLUTION*

167 Following the introduction of the hyperparasite, we see pronounced shifts in the evolution of  
168 virulence depending on the extent to which hyperparasites modify parasite infectivity ( $\eta$ ) and/or  
169 virulence ( $\lambda$ ), and the extent to which co-transmission of the hyperparasite ( $\rho$ ) occurs. When the  
170 hyperparasite causes hypovirulence (a reduction in the disease-associated mortality rate,  $\lambda < 1$ ), the  
171 parasite always experiences selection for higher baseline virulence (Fig. 1a). However, the picture is

172 more complicated when the hyperparasite either causes no change to virulence ( $\lambda = 1$ ; Fig. 1b) or  
173 induces hypervirulence ( $\lambda > 1$ ; Fig. 1c). Specifically, when the hyperparasite strongly reduces  
174 parasite transmission ( $\eta \ll 1$ ), the parasite evolves higher virulence, and when the hyperparasite  
175 increases transmission ( $\eta > 1$ ), virulence either remains virtually unchanged ( $\lambda = 1$ ; Fig. 1b) or  
176 evolves to lower levels ( $\lambda > 1$ ; Fig. 1c). Yet at intermediate values, there is a hysteresis effect which  
177 becomes more prominent as the virulence modifier ( $\lambda$ ) or probability of co-transmission ( $\rho$ )  
178 increase (Fig. 1b-c).

179

180 The hysteresis effect (the system demonstrates different behaviour as a parameter is smoothly  
181 varied from high to low or from low to high) means that the system can have two evolutionary  
182 attractors, and therefore small changes in the underlying ecology (e.g. effects of the hyperparasite  
183 on parasite virulence or infectivity) may cause sudden shifts between high and low virulence states  
184 that are difficult to reverse (Fig. 2). For example, suppose the hyperparasite causes an increase in  
185 virulence ( $\lambda > 1$ ; Fig. 1c), co-transmits with high probability ( $\rho \approx 1$ ), and halves the transmissibility  
186 of the parasite ( $\eta = 0.5$ ). Selection would then favour a reduction in evolved virulence relative to  
187 the absence of the hyperparasite ( $\alpha^* < \alpha_0$ ) (Fig. 2). A small reduction in the infectivity modifier  
188 below a critical threshold,  $\eta_c^1$ , would suddenly shift selection for increased virulence ( $\alpha^* > \alpha_0$ ), but  
189 a reversion in the infectivity modifier to its initial value ( $\eta > \eta_c^1$ ) would not lead to a drop in  
190 virulence until a second critical threshold,  $\eta > \eta_c^2 > \eta_c^1$  is breached (Fig. 2). Thus, relatively small  
191 changes in the effects of the hyperparasite on parasite transmission can lead to large changes in the  
192 evolution of virulence that may be difficult to reverse.

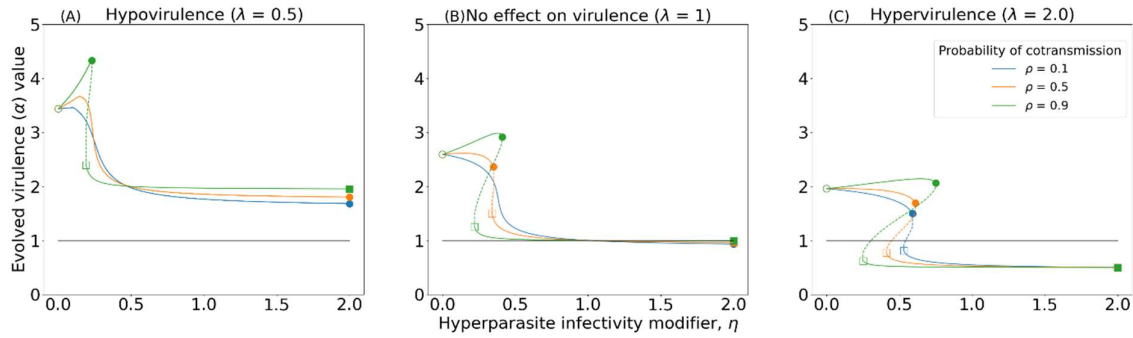

193

194 *Figure 1: Evolutionary consequences for parasite virulence (solid: attractors, dashed: repellers) as the effects of the*  
195 *hyperparasite on parasite infectivity (hypoinfectivity:  $\eta < 1$ ; hyperinfectivity:  $\eta > 1$ ) and virulence ( $\lambda$ ) vary. (A)*  
196 *hypovirulence ( $\lambda < 1$ ); (B) no effect on virulence ( $\lambda = 1$ ); (C) hypervirulence ( $\lambda > 1$ ). All panels contain three sets of curves*  
197 *showing the evolved outcome as the probability of hyperparasite co-transmission varies:  $\rho = 0.1$  (blue),  $\rho = 0.5$  (orange),*  
198  *$\rho = 0.9$  (green). The start and end of the hysteresis section are shown with empty and filled shapes. The black line indicates*  
199 *the ancestral state prior to the introduction of the hyperparasite. (A-C) Evolved levels of virulence.*

200

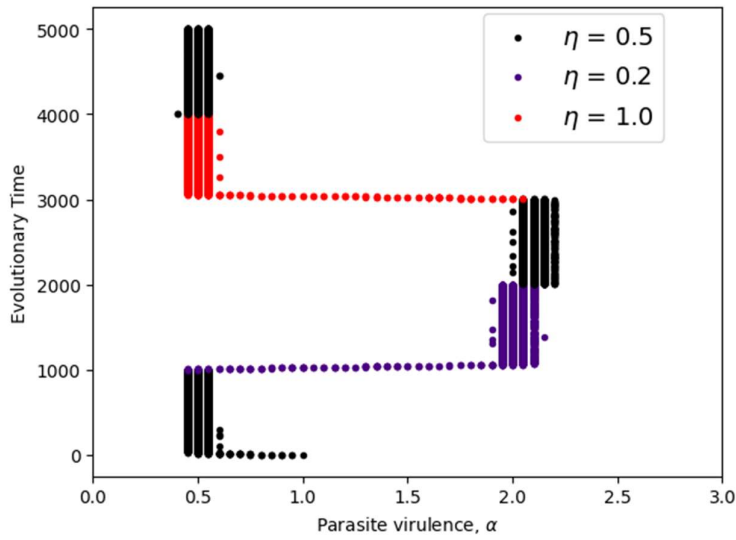

201

202 *Figure 2: Evolutionary simulations showing the hysteresis affect observed in Figure 1 due to variation in the effects of the*  
203 *hyperparasite on parasite infectivity,  $\eta$ . A relatively small shift (purple) from an initial value of  $\eta$  (black) leads to a sharp*  
204 *increase in virulence. However, a reversion to the initial value of  $\eta$  (black) does not lead to a return to lower virulence.*  
205 *Instead, virulence does not change significantly until a critical threshold is reached (red). Parameters as in Table 1 except*  
206  *$\lambda = 2.0, \rho = 0.9$ .*

207 *EFFECTS OF HYPERPARASITISM ON THE HOST POPULATION*

208 Although the parasite may evolve higher or lower baseline virulence following the introduction of  
209 the hyperparasite, whether this has a net positive or negative effect for the host population depends  
210 on not only the new level of virulence, but also the effects on parasite prevalence, the prevalence of  
211 hyperparasites, and the effects of hyperparasitism on virulence. We therefore consider the  
212 ecological consequences of the hyperparasite on the host following evolutionary shifts in parasite  
213 virulence.

214

215 Intuitively, when the hyperparasite causes an evolutionary increase in virulence while not inducing  
216 hypovirulence, the burden on infected hosts (i.e. the average disease-associated mortality rate) is  
217 always higher (Fig. 3B-C) and the resulting host population size is lower (Fig. 3E-F). This is especially  
218 pronounced when the hyperparasite strongly reduces transmission ( $\eta \ll 1$ ). However, the burden  
219 on hosts is less straightforward when the hyperparasite induces hypovirulence while selecting for  
220 higher virulence (Fig. 3A,D), or induces hypervirulence while selecting for lower virulence (Fig. 3C,F).  
221 For example, the latter scenario can lead to little effect on the mortality rate of infected hosts (Fig.  
222 3C) but a marked increase in the host population size (Fig. 3F).

223

224 Crucially, the hysteresis effect in the evolution of virulence has a striking effect on the host  
225 population, with relatively small shifts in the effects of hyperparasites on transmission ( $\eta$ ) or on the  
226 probability of co-transmission ( $\rho$ ) causing substantial changes in the relative mortality rate of  
227 infected hosts (Fig. 3B-C) and the host population size (Fig. 3E-F). While the hysteresis effect  
228 separates a region of lower host population size from a region of higher host population size (Fig.  
229 3D-F), this does not hold for the burden on infected hosts (Fig. 3A-C). Typically, infected hosts either  
230 experience a significant increase in average disease burden (for sufficiently low values of  $\eta$ ), or there

231 is little effect. This suggests that the introduction of a hyperparasite rarely improves the outcome of  
232 infection on average, even if it is beneficial at the population level by reducing the proportion of the  
233 population that is infected. We also see that as the probability of coinfections ( $\rho$ ) increases, the  
234 effect of introducing the hyperparasites on the average disease burden for infected hosts and on the  
235 host population size typically grows stronger.

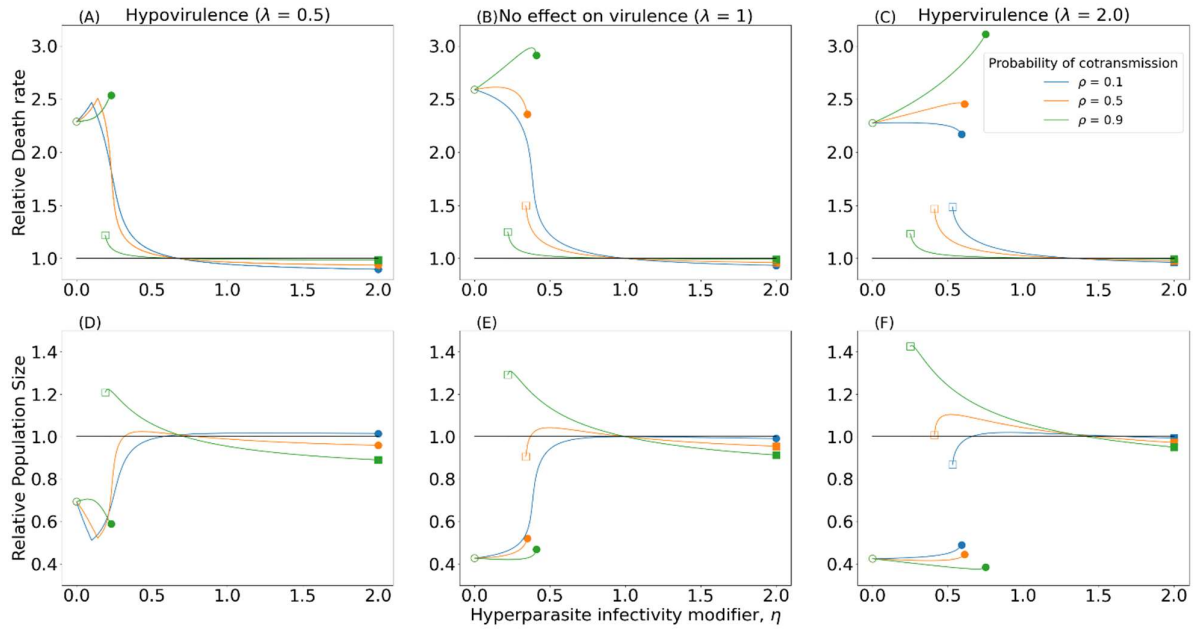

236

237 *Figure 3: Ecological consequences of hyperparasitism for the host as the effects of the hyperparasite on parasite infectivity*

238 *(hypoinfectivity:  $\eta < 1$ ; hyperinfectivity:  $\eta > 1$ ) and virulence ( $\lambda$ ) vary. Left column: hypovirulence ( $\lambda < 1$ ); middle column:*

239 *no effect on virulence ( $\lambda = 1$ ); right column: hypervirulence ( $\lambda > 1$ ). All panels contain three sets of curves showing the*

240 *evolved outcome as the probability of hyperparasite co-transmission varies (shown in Fig. 1):  $\rho = 0.1$  (blue),  $\rho = 0.5$*

241 *(orange),  $\rho = 0.9$  (green). The start and end of the hysteresis section are shown with empty and filled shapes. The black line*

242 *indicates the ancestral state prior to the introduction of the hyperparasite. (A-C) Average mortality rate of infected hosts*

243 *relative to before the introduction of the hyperparasite. (D-F) Host population size relative to before the introduction of the*

244 *hyperparasite.*

245 *HYPERPARASITE-INDUCED DIVERSIFICATION IN PARASITE VIRULENCE*

246 In the absence of the hyperparasite, parasite virulence evolves to a continuously stable strategy due  
247 to the trade-off with transmission, which results in diminishing returns for the parasite. The  
248 introduction of the hyperparasite either shifts the continuously stable strategy to a new value (as in  
249 Fig. 1) or causes the parasite population to diversify through evolutionary branching into two strains,  
250 one with relatively high virulence and the other with relatively low virulence (Fig. 4). In general,  
251 branching is most likely to occur when the hyperparasite causes hypervirulence ( $\lambda > 1$ ) and strong  
252 hypoinfectivity ( $\eta \ll 1$ ), and the probability of co-transmission is not too high ( $\rho \ll 1$ ) (Fig. 5).  
253 When hyperparasites increase virulence and reduce the infectivity of parasites, two contrasting  
254 strategies can coexist. The first is a “short-lived”, more virulent strain which infects as many hosts as  
255 possible before being itself infected by the hyperparasite (green branch, Fig. 4). The second is a  
256 “long-lived”, less virulent strain which prioritises host infections whilst hyperparasitised (orange  
257 branch, Fig. 4).

258

259 However, even though one of the parasite strains is less virulent than the other, both are more  
260 virulent than the ancestral strain in the absence of the hyperparasite (Fig. 4a). The more virulent  
261 strain is rarely infected by the hyperparasite (Fig. 4d), as the host either dies prior to encountering  
262 the hyperparasite, or experiences hypervirulence and so dies shortly after being hyperparasitised.  
263 Despite the parasite branching into two distinct strategies that are both more virulent than the  
264 ancestral state, the overall impact on host and parasite population sizes is minimal (Fig. 4b-d).



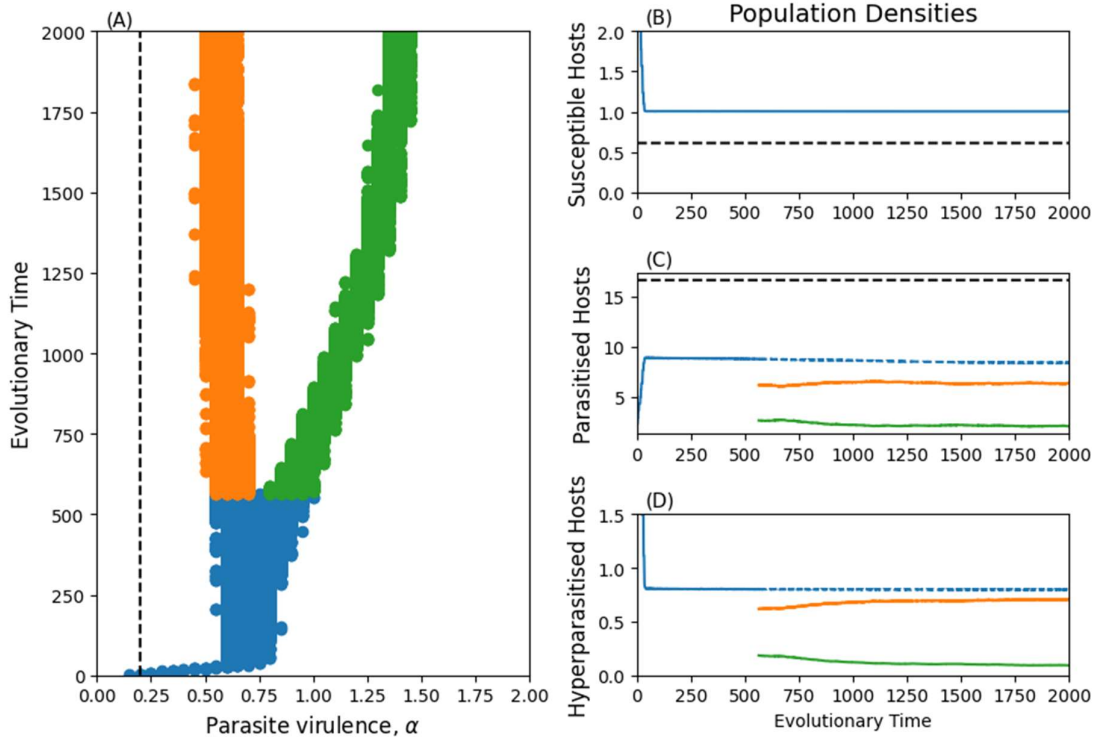

265

266

267

268

269

270

271

Figure 4. Evolutionary branching in parasite virulence following the introduction of the hyperparasite. Parasite virulence in the absence of the hyperparasite is shown by the dashed line in (A). The parasite branches into relatively high (green) and low (orange) virulence strains. (B-D) Densities of the host, parasite and hyperparasite populations: total (blue), high-virulence strain (green), low-virulence strain (orange). The density of the host and parasite populations in the absence of the hyperparasite are plotted with a dashed black line. Parameters as in Table 1 except  $d = 0.1, \sigma = 0.4, \rho = 0.5, \eta = 0.25, \lambda = 5.0, \gamma = 0.1$ .

272

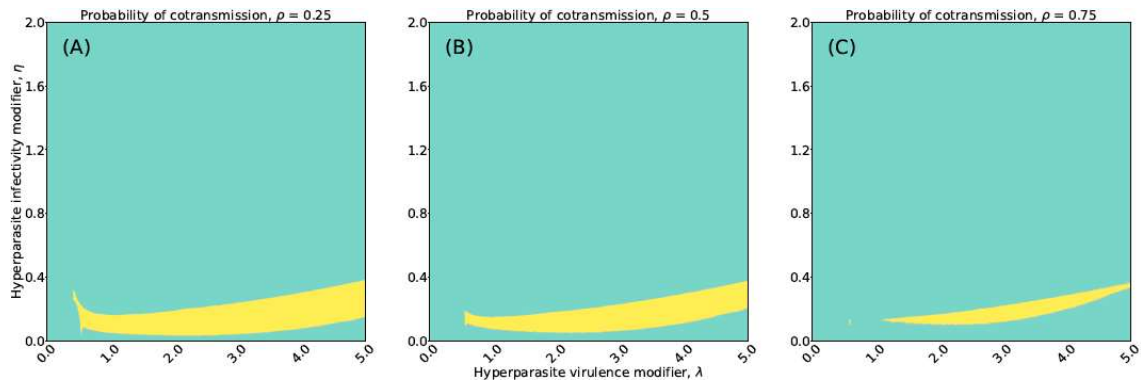

273

274 *Figure 5. Regions where evolutionary branching occurs (yellow) for the parasite following the introduction of the*

275 *hyperparasite, as the effects on transmission ( $\eta$ ) and virulence ( $\lambda$ ) vary. Parameters as in Table 1 except  $d = 0.1, \sigma =$*

276 *0.4,  $\gamma = 0.1$ .*

277 DISCUSSION

278 Hyperparasites are abundant in nature and are promising sources of biological control in industry  
279 (e.g. food production) and public health (e.g. phage therapy to combat antimicrobial resistance). Yet  
280 the eco-evolutionary effects of hyperparasitism are poorly understood. In this study, we have  
281 theoretically explored the impact of hyperparasites on the evolution of parasite virulence and the  
282 consequences for the host population. We have shown that the introduction of hyperparasites can  
283 lead to either higher or lower levels of evolved virulence depending on the ecological effects of the  
284 hyperparasite on the parasite. Crucially, we have shown that relatively small changes in the  
285 ecological effects of hyperparasites can cause large shifts in virulence, which can be difficult to  
286 reverse due to hysteresis. Although a hyperparasite may cause selection for higher parasite  
287 virulence, we have shown that this is not necessarily negative for the host population overall, as the  
288 hyperparasite can suppress parasite prevalence and may mitigate virulence in infected hosts. Finally,  
289 our model shows that the introduction of a hyperparasite can induce diversification in the parasite  
290 population, with the potential for both strains to evolve to higher levels of virulence than in the  
291 absence of the hyperparasite. Overall, our results suggest that the introduction of hyperparasites  
292 can have a strong impact on the evolution of parasite virulence and that the nature of the outcome  
293 depends crucially on how the hyperparasite affects parasite virulence and transmission.

294

295 Higher parasite virulence typically evolves under two conditions: either the hyperparasite  
296 dramatically reduces the infectivity of the parasite population relative to the effect on parasite  
297 virulence ( $\eta < \lambda$  and  $\eta < 1$ ), or the hyperparasite reduces the realised virulence when hosts are  
298 infected ( $\lambda < 1$ ). The former scenario selects for higher virulence because the transmission rate  
299 from hyperparasitised hosts is reduced to a greater extent than realised virulence, which shifts the  
300 balance in the transmission-virulence trade-off to greater transmission. In the second scenario ( $\lambda <$   
301  $1$ ), realised virulence is lower in hyperparasitised hosts and so the increased transmission comes at a

302 reduced cost. This can be trivially understood by considering a hyperparasite that completely  
303 mitigates virulence ( $\lambda = 0$ ), which greatly benefits the parasite. Conversely, when  $\lambda > 1$  the  
304 hyperparasite increases realised virulence and therefore selects for lower intrinsic virulence.

305

306 The hysteresis effect in our model suggests that not only might relatively small changes in  
307 hyperparasite traits cause large evolutionary changes in the parasite, but that these might be  
308 difficult to reverse. Hysteresis arises because for certain regions of parameter space the system is  
309 bistable, meaning that the parasite can evolve to have relatively high or low virulence depending on  
310 the current level of virulence. The hysteresis effect can be understood due to changes in the  
311 prevalence of the hyperparasite. When the hyperparasite causes a significant reduction in  
312 transmission ( $\eta \ll 1$ ) it is very costly to the parasite and so selection favours higher transmission  
313 and virulence to avoid being hyperparasitised (upper branch). The hyperparasite is therefore at  
314 relatively low prevalence. As the effects of the hyperparasite on infectivity weaken ( $\eta$  increases), the  
315 hyperparasite may become more common if it can co-transmit well with the parasite (high  $\rho$ ),  
316 resulting in a gradual increase in hyperparasite prevalence. Eventually a threshold is reached where  
317 the risk of hyperparasitism is sufficiently high and the cost sufficiently low that selection favours a  
318 large reduction in parasite virulence (lower branch), which feeds back to further increase  
319 hyperparasite prevalence. This positive feedback, resulting in high hyperparasite prevalence, is  
320 crucial to the hysteresis effect. If the hyperparasite once again reduces parasite infectivity more  
321 strongly ( $\eta$  decreases), the system does not return to the high virulence state because hyperparasite  
322 prevalence remains high (lower branch). As  $\eta$  continues to fall so too does hyperparasite prevalence,  
323 until eventually the risk of hyperparasitism is sufficiently low and the cost sufficiently high that  
324 selection favours a large increase in parasite virulence (upper branch).

325

326 The hysteresis effect has especially important implications for biocontrol, as a relatively small change  
327 in the hyperparasite can have a large effect on the evolution of virulence and on the host  
328 population. While hysteresis is well documented in the ecological literature (e.g. the spruce  
329 budworm (Ludwig, Jones, and Holling 1978)), few examples exist in evolutionary models (Prado et al.  
330 2009). As an exception, Prado *et al.* 2009 observed hysteresis when considering the evolution of host  
331 sociality and pathogen virulence within contact networks. Prado *et al.* observed that the cycling  
332 behaviour they see within their system, has hysteresis-like behaviour where selection for or against  
333 host sociality does not occur until the parasite passes critical thresholds.

334

335 Our model reveals that the introduction of a hyperparasite can cause disruptive selection leading to  
336 diversification into relatively high and low virulence parasite strains (although the “low” virulence  
337 strain may still be more virulent than the ancestral strain, as in Fig. 4). Branching typically requires  
338 the transmission-virulence trade-off to be close to linear as strongly diminishing returns have a  
339 balancing effect on selection. Branching also typically requires the hyperparasite to reduce the  
340 infectivity of the parasite far more than it decreases virulence ( $\eta \ll \lambda$ ), which facilitates the  
341 existence of high and low virulence phenotypes by creating distinct ecological niches. The high  
342 virulence phenotype is rarely infected by the hyperparasite, favouring a “live fast, die young”  
343 strategy, while the less virulent phenotype has a longer infectious period to mitigate the burden of  
344 the hyperparasite.

345

346 Our study is closely related to previous theoretical explorations of evolution in host-parasite-  
347 hyperparasite systems (Sandhu et al. 2021; Northrup et al. 2021). Sandhu et al (2021) also explored  
348 the evolution of parasite virulence, but in contrast to our study found that the introduction of a  
349 hyperparasite generally selects for increased virulence and reduces the average mortality rate of the  
350 host. Furthermore, Sandhu et al (2021) did not observe a hysteresis effect, nor did they find

351 diversification in their model of virulence evolution. The differences in our results are likely due to  
352 crucial differences in our assumptions. In particular, we assumed that hosts could recover from  
353 infection and that the hyperparasite is co-transmitted with a certain probability ( $\rho$ ) rather than  
354 always occurring, as in Sandhu et al. In reality, one would not expect the hyperparasite to always co-  
355 transmit with the parasite, and our model reveals that this parameter has critical effects on the  
356 evolution of virulence. Although models of hyperparasitism are relatively rare, especially in an  
357 evolutionary context, some of our key findings are mirrored in models of other tripartite systems.  
358 For example, multiple studies have found that introducing an additional species to a host-parasite  
359 system can lead to evolutionary branching in the host (Best 2018) or the parasite (Kisdi, Geritz, and  
360 Boldin 2013; Best 2018; Smith and Ashby 2022) populations. In a related study that also has  
361 relevance to biocontrol, Smith and Ashby (2022) explore how the introduction of a tolerance-  
362 conferring defensive symbiont affects the evolution of parasite virulence. They show that even if the  
363 defensive symbiont is initially beneficial to the host population, in the long-term it is costly because  
364 it always selects for higher parasite virulence. Our results similarly emphasise the complex eco-  
365 evolutionary outcomes that can arise following the introduction of a hyperparasite, with potentially  
366 disastrous consequences for the host population.

367

368 In established host-parasite-hyperparasite systems, it is difficult to separate the ecological and  
369 evolutionary consequences of the hyperparasite. Few empirical studies have therefore explored the  
370 effects of hyperparasitism on parasite evolution (Parratt and Laine 2016), and those that do often  
371 focus on consequences for antimicrobial resistance (Chan et al. 2016; Burmeister et al. 2020), the  
372 acquisition of virulence factors from hyperparasites (Miao and Miller 1999), or pleiotropic effects on  
373 virulence due to selection for resistance against hyperparasitism (Castledine et al. 2022). For  
374 example, (Evans et al. 2010) showed that strains of the bacteria *Erwinia carotovora ssp. atroseptica*  
375 (*Eca*) resistant to the hyperparasite  $\phi$ AT1 were less likely to produce rot in potato tubers; Castledine

376 et al. showed that evolution of phage resistance in *Pseudomonas aeruginosa* coincided with the loss  
377 of virulence in vitro and in vivo; and (Scanlan and Buckling 2012) showed that coevolution between  
378 the bacteria *P. fluorescens* and a lytic phage ( $\phi 2$ ) selects for a mucoid phenotype, which is a  
379 virulence factor in both lung infections of cystic fibrosis patients and in plant infections. Clearly, the  
380 available empirical evidence suggests that hyperparasites can indeed have significant evolutionary  
381 effects on parasite virulence, although the precise effects may depend on pleiotropy between  
382 resistance and virulence. Our model did not consider resistance to hyperparasitism but  
383 understanding how pleiotropy with resistance affects virulence evolution is a critical direction for  
384 future theoretical work (Sandhu et al. 2021).

385

386 We focused our investigation on the evolution of virulence, but the evolutionary dynamics of the  
387 hyperparasite are also likely to be important (Sandhu et al. 2021; Northrup et al. 2021). However, in  
388 certain cases the hyperparasite might behave as if it is evolutionarily static (e.g. the repeated  
389 application of a particular biocontrol to an agricultural crop), in which case the model analysed here  
390 will be especially applicable. Still, future theoretical work should consider how our findings are  
391 affected by hyperparasite evolution, and whether the hysteresis in our model could lead to  
392 fluctuating selection as in Prado et al. (2009). Additionally, the joint dynamics of resistance and  
393 virulence evolution deserve further scrutiny, which could be explored using a resource-allocation  
394 model where the parasite can either allocate resources to transmission or defence, with the overall  
395 resource “budget” depending on the level of virulence.

396

397 Overall, we have shown that the introduction of hyperparasites can have dramatic effects on the  
398 evolutionary dynamics of parasite virulence, leading to selection for higher or lower virulence, or to  
399 branching, with the outcome critically dependent on the effects of the hyperparasite on infectivity  
400 and realised virulence, and on the probability of co-transmission. We have also shown how relatively

401 small changes in hyperparasite traits can have dramatic consequences for virulence evolution, which  
402 has important implications for the use of hyperparasites as agents of biocontrol.

403

#### 404 ACKNOWLEDGEMENTS

405 JW is supported by a scholarship from the EPSRC Centre for Doctoral Training in Statistical Applied  
406 Mathematics at Bath (SAMBa), under the project EP/L015684/1. BA is supported by the Natural  
407 Environment Research Council (grant numbers NE/N014979/1 and NE/V003909/1). We acknowledge  
408 the support of the Natural Sciences and Engineering Research Council of Canada (NSERC). Nous  
409 remercions le Conseil de recherches en sciences naturelles et en génie du Canada (CRSNG) de son  
410 soutien.

411

#### 412 CONFLICTS OF INTEREST

413 The authors declare they have no conflicts of interest

#### 414 REFERENCES

- 415 Ashelford, Kevin E., Martin J. Day, and John C. Fry. 2003. 'Elevated Abundance of Bacteriophage  
416 Infecting Bacteria in Soil'. *Applied and Environmental Microbiology* 69 (1): 285–89.  
417 <https://doi.org/10.1128/AEM.69.1.285-289.2003>.
- 418 Berchieri, A., M.A. Lovell, and P.A. Barrow. 1991. 'The Activity in the Chicken Alimentary Tract of  
419 Bacteriophages Lytic for Salmonella Typhimurium'. *Research in Microbiology* 142 (5): 541–49.  
420 [https://doi.org/10.1016/0923-2508\(91\)90187-F](https://doi.org/10.1016/0923-2508(91)90187-F).
- 421 Best, Alex. 2018. 'Host–Pathogen Coevolution in the Presence of Predators: Fluctuating Selection  
422 and Ecological Feedbacks'. *Proceedings of the Royal Society B: Biological Sciences* 285 (1885):  
423 20180928. <https://doi.org/10.1098/rspb.2018.0928>.
- 424 Bryner, Sarah Franziska, and Daniel Rigling. 2012. 'VIRULENCE NOT ONLY COSTS BUT ALSO BENEFITS  
425 THE TRANSMISSION OF A FUNGAL VIRUS: VIRULENCE AND TRANSMISSIBILITY OF A FUNGAL VIRUS'.  
426 *Evolution* 66 (8): 2540–50. <https://doi.org/10.1111/j.1558-5646.2012.01637.x>.
- 427 Burmeister, Alita R., Abigail Fortier, Carli Roush, Adam J. Lessing, Rose G. Bender, Roxanna  
428 Barahman, Raeven Grant, Benjamin K. Chan, and Paul E. Turner. 2020. 'Pleiotropy Complicates a  
429 Trade-off between Phage Resistance and Antibiotic Resistance'. *Proceedings of the National  
430 Academy of Sciences* 117 (21): 11207–16. <https://doi.org/10.1073/pnas.1919888117>.
- 431 Castledine, Meaghan, Daniel Padfield, Pawel Sierocinski, Jesica Soria Pascual, Adam Hughes, Lotta  
432 Mäkinen, Ville-Petri Friman, et al. 2022. 'Parallel Evolution of Pseudomonas Aeruginosa Phage  
433 Resistance and Virulence Loss in Response to Phage Treatment in Vivo and in Vitro'. *ELife* 11  
434 (February): e73679. <https://doi.org/10.7554/eLife.73679>.
- 435 Chan, Benjamin K., Mark Sistrom, John E. Wertz, Kaitlyn E. Kortright, Deepak Narayan, and Paul E.  
436 Turner. 2016. 'Phage Selection Restores Antibiotic Sensitivity in MDR Pseudomonas Aeruginosa'.  
437 *Scientific Reports* 6 (1): 26717. <https://doi.org/10.1038/srep26717>.



- 438 Chen, Yibao, Lan Yang, Dan Yang, Jiaoyang Song, Can Wang, Erchao Sun, Changqin Gu, et al. 2020.  
439 'Specific Integration of Temperate Phage Decreases the Pathogenicity of Host Bacteria'. *Frontiers in*  
440 *Cellular and Infection Microbiology* 10 (February): 14. <https://doi.org/10.3389/fcimb.2020.00014>.
- 441 Chhibber, Sanjay, Sandeep Kaur, and Seema Kumari. 2008. 'Therapeutic Potential of Bacteriophage  
442 in Treating Klebsiella Pneumoniae B5055-Mediated Lobar Pneumonia in Mice'. *Journal of Medical*  
443 *Microbiology* 57 (12): 1508–13. <https://doi.org/10.1099/jmm.0.2008/002873-0>.
- 444 Evans, T.J., A. Trauner, E. Komitopoulou, and G.P.C. Salmond. 2010. 'Exploitation of a New  
445 Flagellatropic Phage of *Erwinia* for Positive Selection of Bacterial Mutants Attenuated in Plant  
446 Virulence: Towards Phage Therapy'. *Journal of Applied Microbiology* 108 (2): 676–85.  
447 <https://doi.org/10.1111/j.1365-2672.2009.04462.x>.
- 448 Faruque, Shah M., Iftexhar Bin Naser, M. Jahirul Islam, A. S. G. Faruque, A. N. Ghosh, G. Balakrish  
449 Nair, David A. Sack, and John J. Mekalanos. 2005. 'Seasonal Epidemics of Cholera Inversely Correlate  
450 with the Prevalence of Environmental Cholera Phages'. *Proceedings of the National Academy of*  
451 *Sciences* 102 (5): 1702–7. <https://doi.org/10.1073/pnas.0408992102>.
- 452 Ferriol-González, Celia, and Pilar Domingo-Calap. 2021. 'Phage Therapy in Livestock and Companion  
453 Animals'. *Antibiotics* 10 (5): 559. <https://doi.org/10.3390/antibiotics10050559>.
- 454 Gordillo Altamirano, Fernando L., and Jeremy J. Barr. 2019. 'Phage Therapy in the Postantibiotic Era'.  
455 *Clinical Microbiology Reviews* 32 (2): e00066-18. <https://doi.org/10.1128/CMR.00066-18>.
- 456 Greer, G. Gordon. 2005. 'Bacteriophage Control of Foodborne Bacteria'. *Journal of Food Protection*  
457 68 (5): 1102–11. <https://doi.org/10.4315/0362-028X-68.5.1102>.
- 458 Haelewaters, Danny, Rachel A. Page, and Donald H. Pfister. 2018. 'Laboulbeniales Hyperparasites  
459 (Fungi, Ascomycota) of Bat Flies: Independent Origins and Host Associations'. *Ecology and Evolution*  
460 8 (16): 8396–8418. <https://doi.org/10.1002/ece3.4359>.
- 461 Hargreaves, Katherine R., Andrew M. Kropinski, and Martha R. J. Clokie. 2014. 'What Does the  
462 Talking?: Quorum Sensing Signalling Genes Discovered in a Bacteriophage Genome'. Edited by  
463 Gunnar F. Kaufmann. *PLoS ONE* 9 (1): e85131. <https://doi.org/10.1371/journal.pone.0085131>.
- 464 Holtappels, Dominique, Kiandro Fortuna, Rob Lavigne, and Jeroen Wagemans. 2021. 'The Future of  
465 Phage Biocontrol in Integrated Plant Protection for Sustainable Crop Production'. *Current Opinion in*  
466 *Biotechnology* 68 (April): 60–71. <https://doi.org/10.1016/j.copbio.2020.08.016>.
- 467 Hurford, Amy, Daniel Cownden, and Troy Day. 2010. 'Next-Generation Tools for Evolutionary  
468 Invasion Analyses'. *Journal of The Royal Society Interface* 7 (45): 561–71.  
469 <https://doi.org/10.1098/rsif.2009.0448>.
- 470 Kakkanat, Asha, Minh-Duy Phan, Alvin W. Lo, Scott A. Beatson, and Mark A. Schembri. 2017. 'Novel  
471 Genes Associated with Enhanced Motility of Escherichia Coli ST131'. Edited by Mark Isalan. *PLOS*  
472 *ONE* 12 (5): e0176290. <https://doi.org/10.1371/journal.pone.0176290>.
- 473 Kisdi, Eva, Stefan A.H. Geritz, and Barbara Boldin. 2013. 'Evolution of Pathogen Virulence under  
474 Selective Predation: A Construction Method to Find Eco-Evolutionary Cycles'. *Journal of Theoretical*  
475 *Biology* 339 (December): 140–50. <https://doi.org/10.1016/j.jtbi.2013.05.023>.
- 476 Ludwig, D., D. D. Jones, and C. S. Holling. 1978. 'Qualitative Analysis of Insect Outbreak Systems: The  
477 Spruce Budworm and Forest'. *The Journal of Animal Ecology* 47 (1): 315.  
478 <https://doi.org/10.2307/3939>.

- 479 Miao, Edward A., and Samuel I. Miller. 1999. 'Bacteriophages in the Evolution of Pathogen–Host  
480 Interactions'. *Proceedings of the National Academy of Sciences* 96 (17): 9452–54.  
481 <https://doi.org/10.1073/pnas.96.17.9452>.
- 482 Mikhailov, Kirill V., Timur G. Simdyanov, and Vladimir V. Aleoshin. 2016. 'Genomic Survey of a  
483 Hyperparasitic Microsporidian *Amphiamblys* Sp. (Metchnikovellidae)'. *Genome Biology and  
484 Evolution*, September, evw235. <https://doi.org/10.1093/gbe/evw235>.
- 485 Mohan, Sharad, K. Kiran Kumar, Vivek Sutar, Supradip Saha, Janet Rowe, and Keith G. Davies. 2020.  
486 'Plant Root-Exudates Recruit Hyperparasitic Bacteria of Phytonematodes by Altered Cuticle Aging:  
487 Implications for Biological Control Strategies'. *Frontiers in Plant Science* 11 (June): 763.  
488 <https://doi.org/10.3389/fpls.2020.00763>.
- 489 Morozov, Andrew Yu., Cécile Robin, and Alain Franc. 2007. 'A Simple Model for the Dynamics of a  
490 Host–Parasite–Hyperparasite Interaction'. *Journal of Theoretical Biology* 249 (2): 246–53.  
491 <https://doi.org/10.1016/j.jtbi.2007.05.041>.
- 492 Munns, Krysty D., L. Brent Selinger, Kim Stanford, Leluo Guan, Todd R. Callaway, and Tim A.  
493 McAllister. 2015. 'Perspectives on Super-Shedding of *Escherichia Coli* O157:H7 by Cattle'. *Foodborne  
494 Pathogens and Disease* 12 (2): 89–103. <https://doi.org/10.1089/fpd.2014.1829>.
- 495 Northrup, Graham R, Steven R Parratt, Carly Rozins, Anna-Liisa Laine, and Mike Boots. 2021. 'The  
496 Evolutionary Dynamics of Hyperparasites'. Preprint. *Evolutionary Biology*.  
497 <https://doi.org/10.1101/2021.12.01.470853>.
- 498 Nuss, Donald L. 2005. 'Hypovirulence: Mycoviruses at the Fungal–Plant Interface'. *Nature Reviews  
499 Microbiology* 3 (8): 632–42. <https://doi.org/10.1038/nrmicro1206>.
- 500 Obradovic, A., J. B. Jones, M. T. Momol, B. Balogh, and S. M. Olson. 2004. 'Management of Tomato  
501 Bacterial Spot in the Field by Foliar Applications of Bacteriophages and SAR Inducers'. *Plant Disease  
502* 88 (7): 736–40. <https://doi.org/10.1094/PDIS.2004.88.7.736>.
- 503 Parratt, Steven R, and Anna-Liisa Laine. 2016. 'The Role of Hyperparasitism in Microbial Pathogen  
504 Ecology and Evolution'. *The ISME Journal* 10 (8): 1815–22. <https://doi.org/10.1038/ismej.2015.247>.
- 505 Parratt, Steven R., and Anna-Liisa Laine. 2018. 'Pathogen Dynamics under Both Bottom-up Host  
506 Resistance and Top-down Hyperparasite Attack'. Edited by Ainhoa Magrach. *Journal of Applied  
507 Ecology* 55 (6): 2976–85. <https://doi.org/10.1111/1365-2664.13185>.
- 508 Prado, Federico, Alyssa Sheih, Jevin D. West, and Benjamin Kerr. 2009. 'Coevolutionary Cycling of  
509 Host Sociality and Pathogen Virulence in Contact Networks'. *Journal of Theoretical Biology* 261 (4):  
510 561–69. <https://doi.org/10.1016/j.jtbi.2009.08.022>.
- 511 Prospero, Simone, Leticia Botella, Alberto Santini, and Cécile Robin. 2021. 'Biological Control of  
512 Emerging Forest Diseases: How Can We Move from Dreams to Reality?' *Forest Ecology and  
513 Management* 496 (September): 119377. <https://doi.org/10.1016/j.foreco.2021.119377>.
- 514 Sandhu, Simran K., Andrew Yu. Morozov, Robert D. Holt, and Michael Barfield. 2021. 'Revisiting the  
515 Role of Hyperparasitism in the Evolution of Virulence'. *The American Naturalist* 197 (2): 216–35.  
516 <https://doi.org/10.1086/712351>.
- 517 Scanlan, Pauline Deirdre, and Angus Buckling. 2012. 'Co-Evolution with Lytic Phage Selects for the  
518 Mucoïd Phenotype of *Pseudomonas Fluorescens* SBW25'. *The ISME Journal* 6 (6): 1148–58.  
519 <https://doi.org/10.1038/ismej.2011.174>.

- 520 Schooley, Robert T., Biswajit Biswas, Jason J. Gill, Adriana Hernandez-Morales, Jacob Lancaster,  
521 Lauren Lessor, Jeremy J. Barr, et al. 2017. 'Development and Use of Personalized Bacteriophage-  
522 Based Therapeutic Cocktails To Treat a Patient with a Disseminated Resistant *Acinetobacter*  
523 *Baumannii* Infection'. *Antimicrobial Agents and Chemotherapy* 61 (10): e00954-17.  
524 <https://doi.org/10.1128/AAC.00954-17>.
- 525 Smith, Cameron A., and Ben Ashby. 2022. 'Tolerance-Confering Defensive Symbionts and the  
526 Evolution of Parasite Virulence'. Preprint. *Evolutionary Biology*.  
527 <https://doi.org/10.1101/2022.12.05.519091>.
- 528 Taylor, Douglas R., Andrew M. Jarosz, Dennis W. Fulbright, and Richard E. Lenski. 1998. 'The  
529 Acquisition of Hypovirulence in Host-Pathogen Systems with Three Trophic Levels'. *The American*  
530 *Naturalist* 151 (4): 343–55. <https://doi.org/10.1086/286123>.
- 531 Waldor, Matthew K., and John J. Mekalanos. 1996. 'Lysogenic Conversion by a Filamentous Phage  
532 Encoding Cholera Toxin'. *Science* 272 (5270): 1910–14.  
533 <https://doi.org/10.1126/science.272.5270.1910>.
- 534 Wendling, Carolin C., Agnes Piecyk, Dominik Refardt, Cynthia Chibani, Robert Hertel, Heiko  
535 Liesegang, Boyke Bunk, Jörg Overmann, and Olivia Roth. 2017. 'Tripartite Species Interaction:  
536 Eukaryotic Hosts Suffer More from Phage Susceptible than from Phage Resistant Bacteria'. *BMC*  
537 *Evolutionary Biology* 17 (1): 98. <https://doi.org/10.1186/s12862-017-0930-2>.
- 538
